# Supplementary material for: A Chemometric-Assisted Colorimetric-Based Inexpensive Paper Biosensor for Glucose Detection
Source: MDPI journal article supplement (doi:10.3390/bios12111008), 2022-11-11
Supplement: s1 [file s1]

# Chemometric Assisted Colorimetric Based Inexpensive Paper Biosensor for Glucose Detection

Vinay Kishnani, Shrishti Kumari and Ankur Gupta\*

\* Correspondence: author: ankurgupta@iitj.ac.in

**Table S1. EDX analysis of papers.**

| Types of Paper                           | Elemental Analysis |       |       |       |      |      |      |      |                   |      |      |                   |      |      |
|------------------------------------------|--------------------|-------|-------|-------|------|------|------|------|-------------------|------|------|-------------------|------|------|
|                                          | C                  |       | O     |       | Si   |      | Al   |      | Ca                |      | Mg   |                   | Cl   |      |
| Whatman No.1                             | 45.24              | 52.37 | 54.81 | 47.64 |      |      |      |      |                   |      |      |                   |      |      |
| Bond Paper                               | 40.28              | 48.45 | 55.28 | 49.93 | 0.11 | 0.06 |      |      | 4.33              | 1.56 |      |                   |      |      |
| Craft Paper (200 GSM)                    | 33.58              | 40.91 | 63.37 | 57.96 | 0.09 | 0.05 |      |      | 2.96              | 1.08 |      |                   |      |      |
| Handmade/ Blotting Paper                 | 44.62              | 52.36 | 52.57 | 46.32 | 1.54 | 0.77 | 0.59 | 0.31 | 0.69              | 0.24 |      |                   |      |      |
| Paper Towel (2-Ply)                      | 44.81              | 52.06 | 54.82 | 47.81 |      |      |      |      | 0.37              | 0.13 |      |                   |      |      |
| Glossy Paper                             | 42.70              | 50.45 | 54.85 | 48.65 | 0.16 | 0.08 |      |      | 2.28              | 0.81 |      |                   |      |      |
| 300GSM Card Sheet                        | 43.89              | 51.05 | 55.99 | 48.90 | 0.02 | 0.01 |      |      | 0.10              | 0.04 |      |                   |      |      |
| Practical Sheet Paper                    | 37.14              | 46.32 | 52.59 | 49.23 | 1.67 | 0.89 |      |      | 7.19              | 2.69 | 1.41 | 0.87              |      |      |
| Ivory Sheet                              | 43.58              | 51.27 | 53.40 | 47.17 | 1.78 | 0.90 |      |      | 0.22              | 0.08 | 1.02 | 0.59              |      |      |
| Sketch Sheet                             | 44.68              | 52.21 | 53.21 | 46.67 | 1.28 | 0.64 |      |      |                   |      | 0.83 | 0.48              |      |      |
| Drawing Sheet                            | 43.45              | 50.74 | 55.75 | 48.88 | 0.67 | 0.33 |      |      | 0.13              | 0.05 |      |                   |      |      |
| A-4 Paper (Normal Printing Paper) 67 GSM | 34.76              | 43.12 | 58.24 | 54.24 |      |      |      |      | 6.22              | 2.31 |      |                   | 0.78 | 0.33 |
| Whatman No.4                             | 46.12              | 52.90 | 53.88 | 47.10 |      |      |      |      |                   |      |      |                   |      |      |
|                                          |                    |       |       |       |      |      |      |      | Weight Percentage |      |      | Atomic Percentage |      |      |

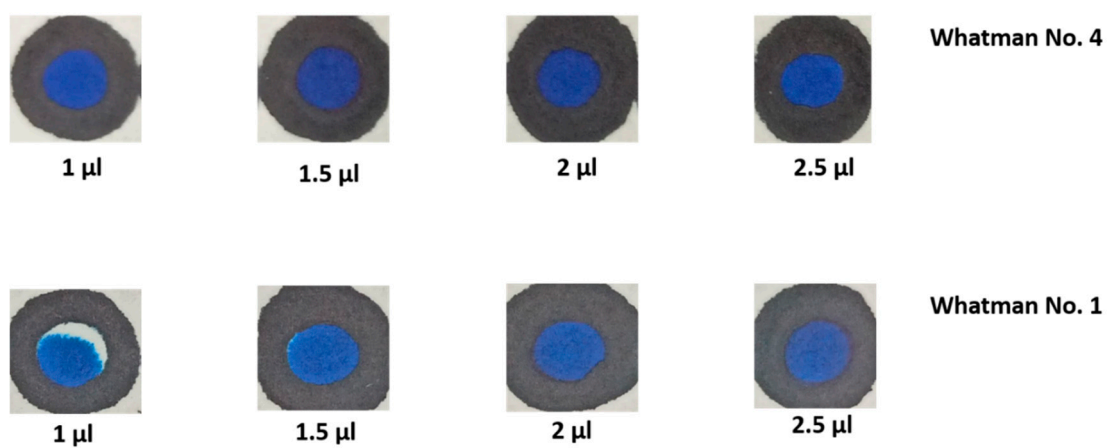

Figure S1. Sample and reagent volume optimization using MB dye solution

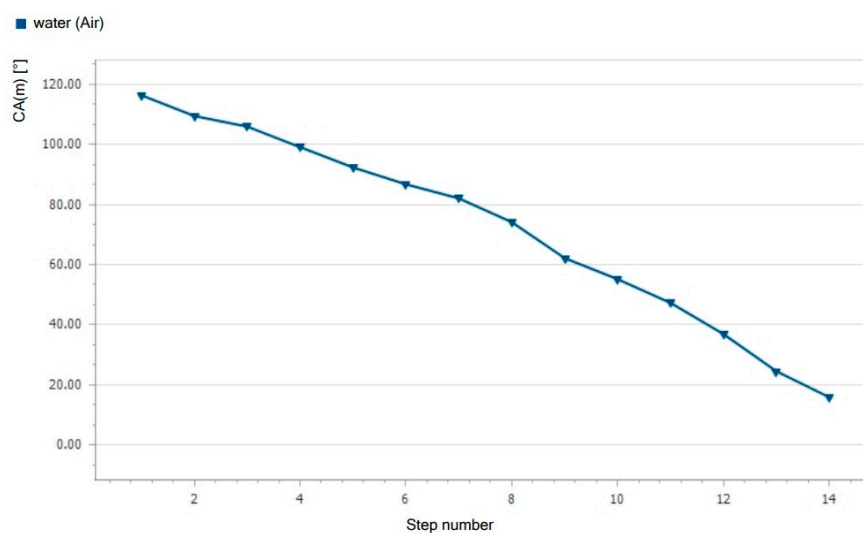

Figure S2. Contact angle measurement of single stroke coated ink over Whatman.4 paper

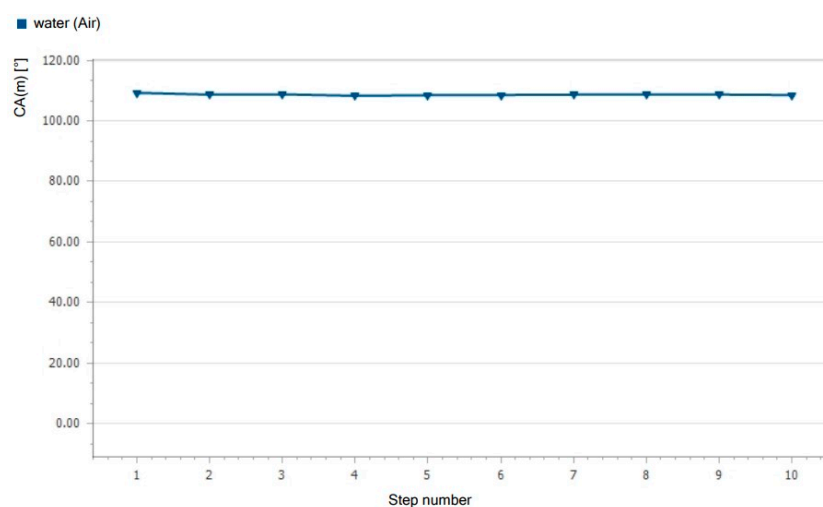

Figure S3. Contact angle measurement of double stroke coated ink over Whatman.4 paper

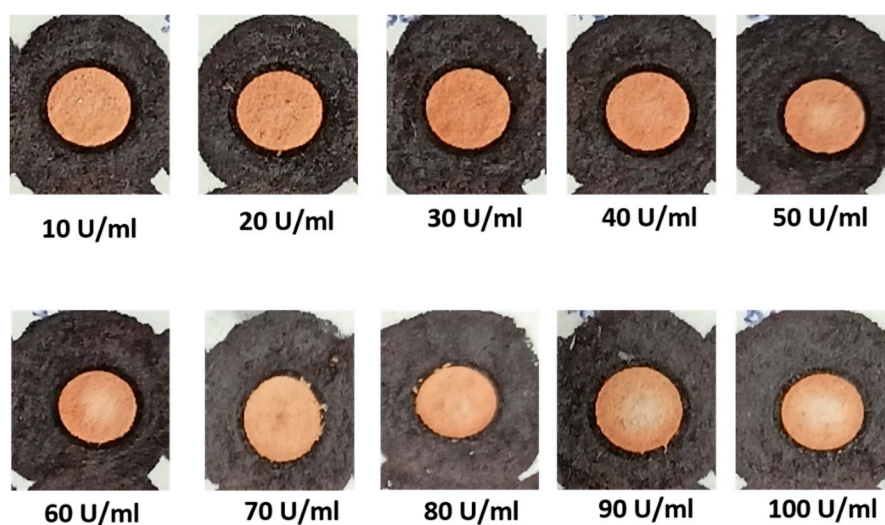

**Figure S4.** Colour development observed for different HRP concentration

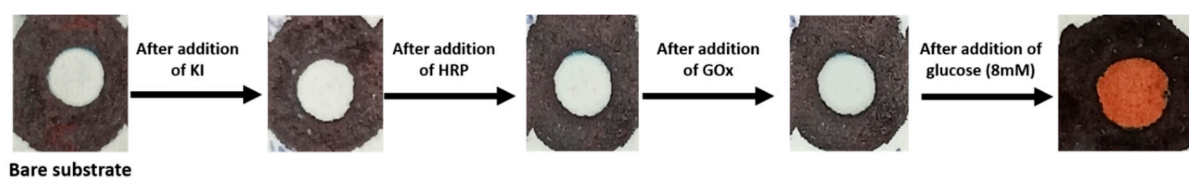

**Figure S5.** Comparison of spots after addition of each reagent

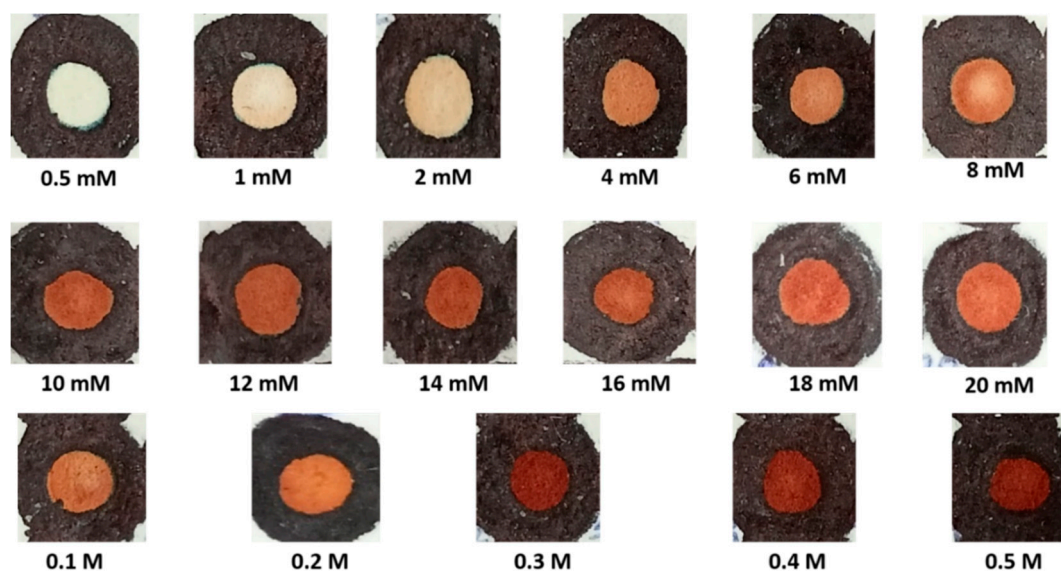

**Figure S6.** Colour development observed for each concentration of glucose solution

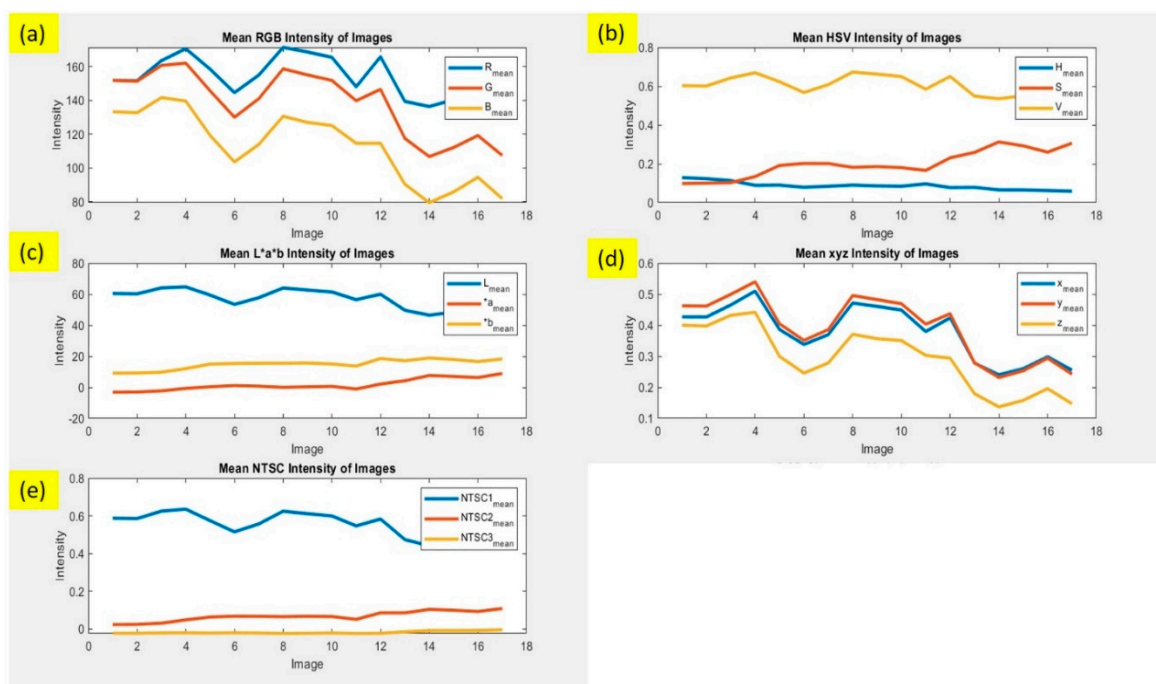

Figure S7. The variation of mean intensity values of all the training images (a) RGB (b) HSV (c) L\*a\*b (d) xyz (e) NTSC.

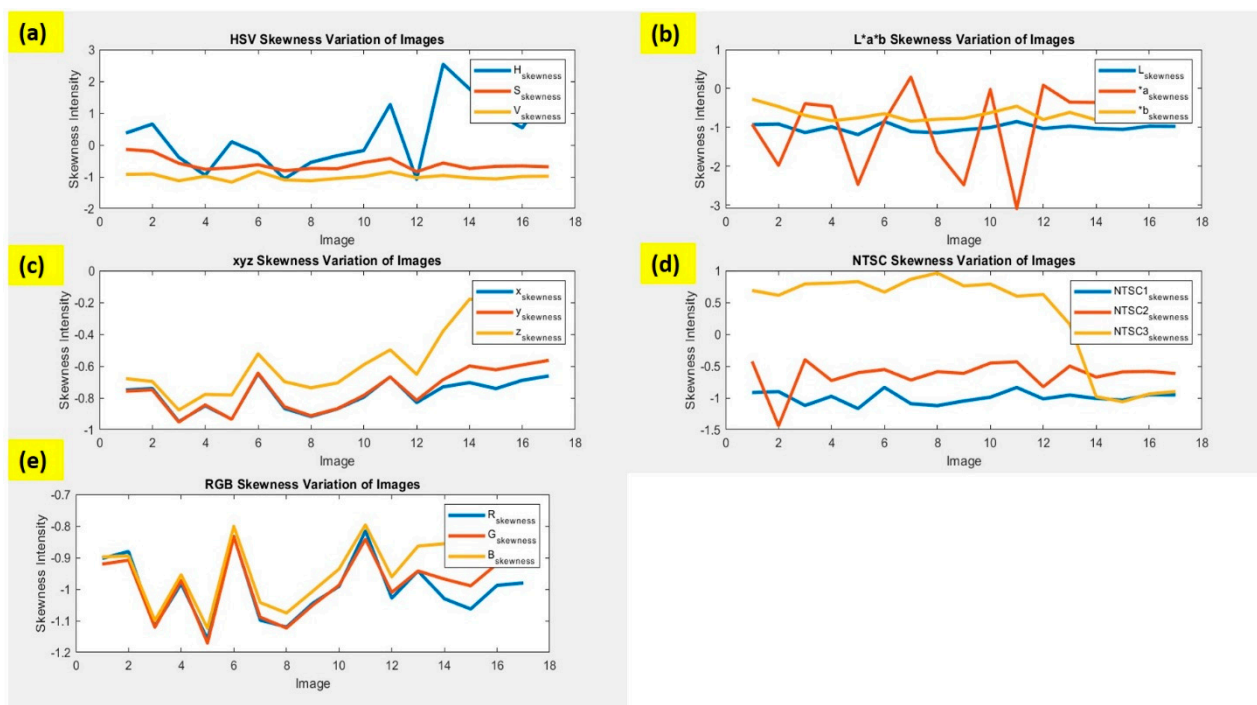

Figure S8. The variation of overall skewness of all the training images (a) HSV (b) L\*a\*b (c) xyz (d) NTSC (e) RGB

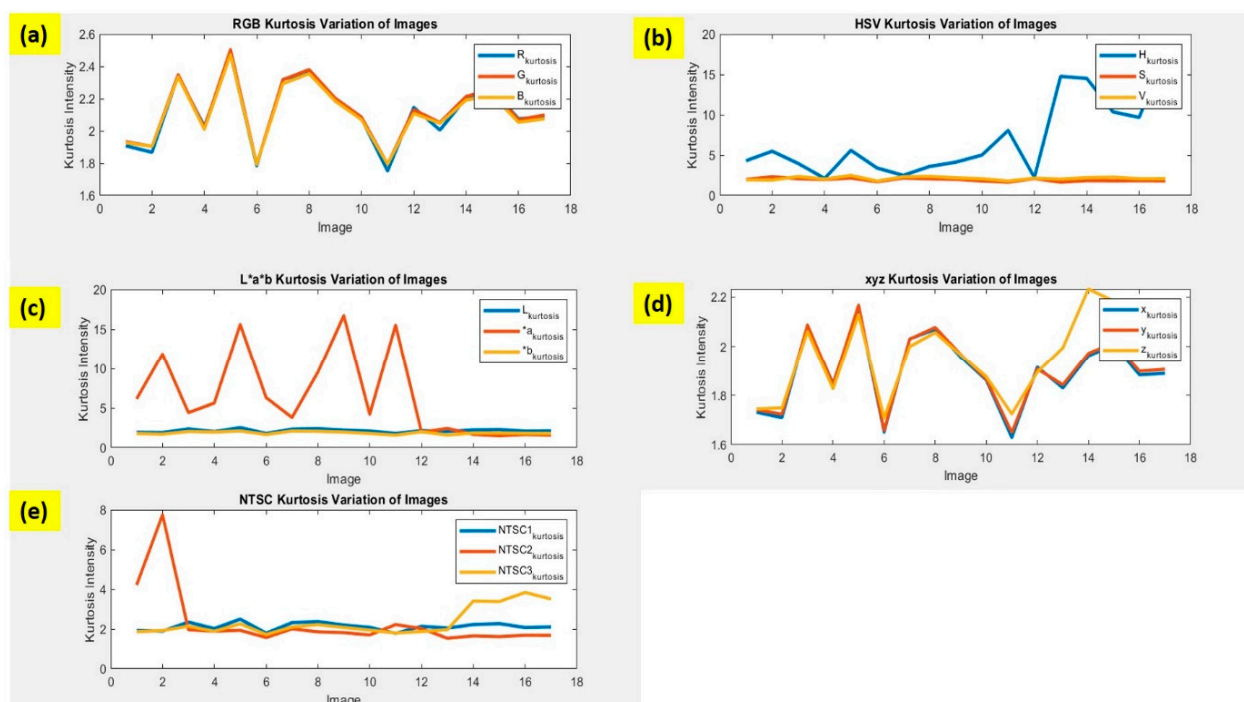

Figure S9. The variation of overall kurtosis of all the training images (a) RGB (b) HSV (c) L\*a\*b (d) xyz (e) NTSC.

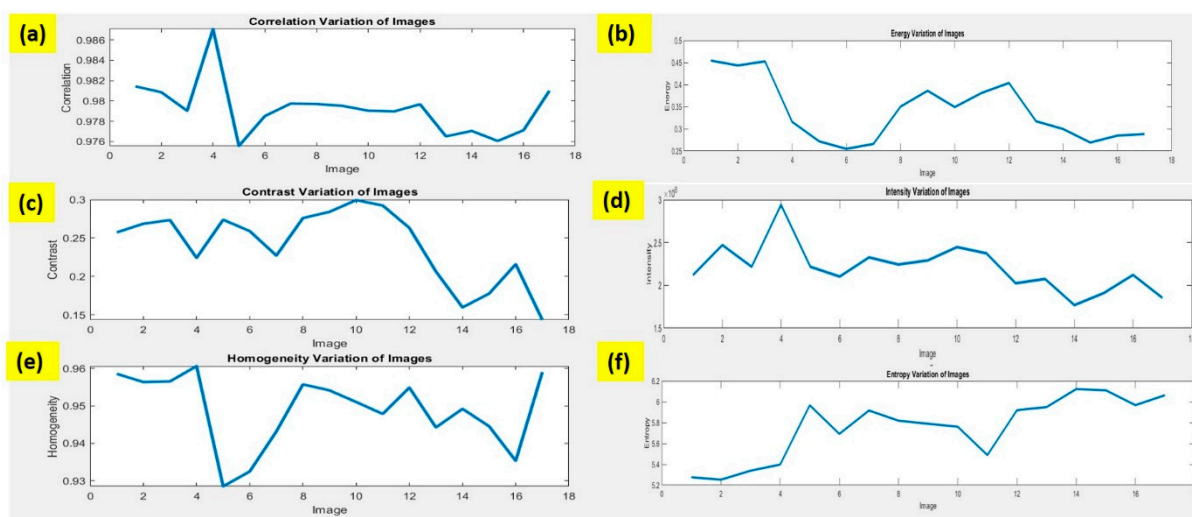

Figure S10. The variation of overall values of training images obtained from GLCM (a) correlation, (b) energy, (c) contrast, (d) intensity, (e) homogeneity, and (f) entropy.

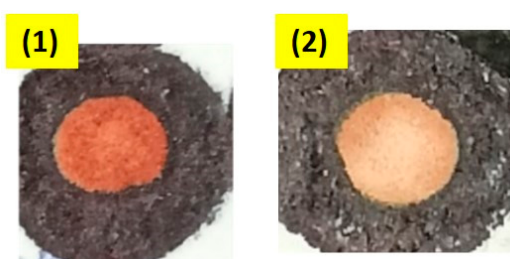



Figure S11. Colour image of unknown samples for the testing of trained data.

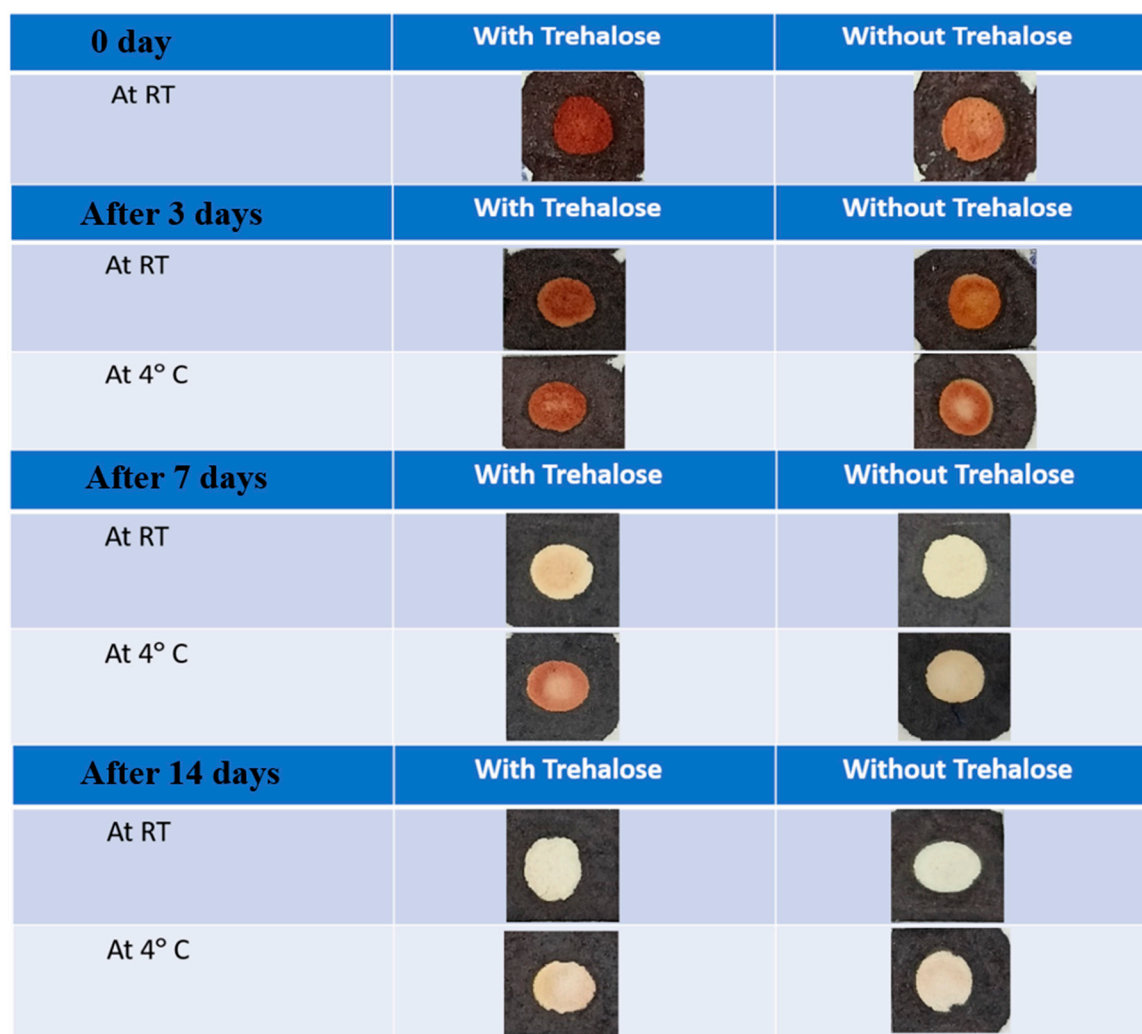

Figure S12. Shelf-life testing of spots kept at room temperature and at 4° C for 14 days
